# Supplementary material for: Characterisation of lung function trajectories and associated early-life predictors in an Australian birth cohort study
Source: PubMed Central journal article supplement — ERJ Open Res. 2022 Mar 21;8(1):00072-2022. doi: 10.1183/23120541.00072-2022 (PMC8943283; doi:10.1183/23120541.00072-2022), 2022-03-21
Supplement: 00072-2022.SUPPLEMENT.pdf [file 00072-2022.SUPPLEMENT.pdf]

1 **SUPPLEMENTARY**

2

3 **Title**

4 Characterization of lung function trajectories and associated early life predictors in  
5 in an Australian birth cohort study

6

7 **Authors**

8 Francesca Sanna<sup>1,2</sup>, Francesca Locatelli<sup>2</sup>, Peter D Sly<sup>3</sup>, Elisha White<sup>4</sup>, David Blake<sup>5</sup>, Jane  
9 Heyworth<sup>6</sup>, Graham L Hall<sup>1,7</sup>, Rachel E Foong<sup>1,7</sup>

10

11 **Affiliations**

12 <sup>1</sup> Wal-yan Respiratory Centre, Children's Lung Health, Telethon Kids Institute, Western Australia,  
13 Australia

14 <sup>2</sup> Unit of Epidemiology and Medical Statistics, Department of Diagnostic and Public Health, University of  
15 Verona, Italy

16 <sup>3</sup> Children's Health and Environment Program, Child Health Research Centre, University of Queensland,  
17 South Brisbane, Australia

18 <sup>4</sup> Royal Darwin Hospital, Northern Territory, Australia

19 <sup>5</sup> Centre for Ecosystem Management, School of Science, Edith Cowan University, Joondalup, Western  
20 Australia, Australia

21 <sup>6</sup> School of Population and Global Health, The University of Western Australia, Perth, Western Australia,  
22 Australia.

23 <sup>7</sup> School of Allied Health, Curtin University, Perth, Australia

24

25

26 **Corresponding author:**

27 Francesca Sanna, PhD,

28 Wal-yan Respiratory Centre, Children's Lung Health, Telethon Kids Institute,

29 Northern Entrance, Perth Children's Hospital

30 15 Hospital Ave, Nedlands WA 6009

31 mail: francesca.sanna@telethonkids.org.au

32

1 **Appendix S1. Additional methods and results**

2

3

4 **Statistical analysis**

5

6 *Early life predictors*

7 Associations between early life predictors and lung function trajectories were first evaluated by  
8 unadjusted multinomial linear and logistic regression. Childhood, parental and environmental  
9 predictors associated with lung function trajectories with  $p < 0.1$  were retained for entry into full  
10 models. The final models were carried out separately for FEV<sub>1</sub>, FVC and FEV<sub>1</sub>/FVC z-scores,  
11 and were adjusted for sex, socio-economic status, preterm birth, childhood asthma, childhood  
12 respiratory infections, childhood atopy, maternal smoking, parental asthma, parental hay fever,  
13 parental eczema, and early life exposure to NO<sub>2</sub> and PM<sub>2.5</sub>Absorbance.

14

15 **Results of air pollution exposure in participants**

16 Descriptive summary statistics for early-life exposure to PM<sub>2.5</sub>Absorbance and NO<sub>2</sub> in the  
17 participants are shown in Supplementary Table 1.

18

19

20 **Results of Lung function trajectories**

21 We also assessed the overlap of participants in both FEV<sub>1</sub> and FVC lung function trajectories  
22 where participants in the lowest trajectories of FEV<sub>1</sub> were not necessary in the lowest trajectories  
23 of FVC (Supplementary Table 5).

24

25

26

27

28

29

1   **References**

- 2 1. Nagin, D. S., & Odgers, C. L. (2010). Group-based trajectory modeling in clinical  
3 research. *Annual Review of Clinical Psychology*, *6*, 109-138.  
4 <https://doi.org/10.1146/annurev.clinpsy.121208.131413>
- 5 2. Peristera, P., Platts, L. G., Magnusson Hanson, L. L., & Westerlund, H. (2018). A comparison  
6 of the B-spline group-based trajectory model with the polynomial group-based trajectory  
7 model for identifying trajectories of depressive symptoms around old-age retirement. *Aging &*  
8 *Mental Health*, *24*(3), 445-452. <https://doi.org/10.1080/13607863.2018.1531371>

Supplementary Table 1 A, B. Descriptive summary of  
PM<sub>2.5</sub>Absorbance and NO<sub>2</sub> during early-life in the Raine  
participants

|                                                                 | <b>Mean</b> | <b>Std Dev</b> | <b>Min</b> | <b>Max</b> |
|-----------------------------------------------------------------|-------------|----------------|------------|------------|
| <b>PM<sub>2.5</sub> Absorbance</b> ( $10^{-5} \text{ m}^{-1}$ ) | 0.94        | ± 0.37         | 0.02       | 2.99       |
| <b>NO<sub>2</sub></b> ( $\mu\text{g}/\text{m}^3$ )              | 5.15        | ± 2.08         | 0.06       | 12.19      |

Supplementary Table 2. Childhood and parenthood characteristics in included and excluded Raine Study participants

| <b>Participant demographics</b>   |                              |                              |                     |
|-----------------------------------|------------------------------|------------------------------|---------------------|
| <b>Variable</b>                   | <b>Included<br/>(n=1512)</b> | <b>Excluded<br/>(n=1356)</b> | <b>P-<br/>value</b> |
| <b>Female sex, %</b>              | 744 (49.21)                  | 670 (49.41)                  | 0.913               |
| Missing values                    | 0 (0.0)                      | 0 (0.0)                      |                     |
| <b>Ethnic origin, %</b>           |                              |                              | 0.797               |
| Caucasian                         | 1321 (87.37)                 | 533 (39.31)                  |                     |
| Other                             | 116 (7.67)                   | 49 (3.61)                    |                     |
| Missing values                    | 75 (4.96)                    | 774 (57.08)                  |                     |
| <b>Socio-economic status, %**</b> |                              |                              | <b>&lt;0.001</b>    |
| ≤16.000                           | 137 (9.06)                   | 95 (7.01)                    |                     |
| 16000-40000                       | 609 (40.28)                  | 359 (26.47)                  |                     |
| ≥40000                            | 653 (43.19)                  | 252 (18.58)                  |                     |
| Missing values                    | 113 (7.47)                   | 650 (47.94)                  |                     |
| <b>Maternal education, %</b>      |                              |                              | <b>&lt;0.001</b>    |
| Low                               | 304 (20.11)                  | 211 (15.56)                  |                     |
| Medium                            | 417 (27.58)                  | 277 (20.43)                  |                     |
| High                              | 683 (45.17)                  | 765 (56.42)                  |                     |
| Missing values                    | 108 (7.14)                   | 103 (7.60)                   |                     |

|                                            |             |              |                  |
|--------------------------------------------|-------------|--------------|------------------|
| <b>Respiratory infections, %</b>           |             |              | <b>&lt;0.001</b> |
| URTI only                                  | 503 (33.27) | 346 (25.52)  |                  |
| LRTI or both                               | 333 (33.27) | 227 (16.74)  |                  |
| Missing values                             | 0 (0.0)     | (0.0)        |                  |
| <b>Preterm (&lt;37 gestational age), %</b> | 101 (6.68)  | 117 (8.63)   | <b>0.046</b>     |
| Missing values                             | 68 (4.50)   | 66 (4.87)    |                  |
| <b>Birthweight</b>                         |             |              | <b>0.218</b>     |
| Low                                        | 122 (8.25)  | 127 (9.37)   |                  |
| Missing values                             | 34 (22.49)  | 46 (33.92)   |                  |
| <b>Current asthma at age 6, %</b>          | 235 (15.54) | 114 (8.41)   | <b>&lt;0.001</b> |
| Missing values                             | 0 (0.0)     | (0.0)        |                  |
| <b>Current asthma at age 14, %</b>         | 147 (9.72)  | 49 (3.61)    | <b>&lt;0.001</b> |
| Missing values                             | 0 (0.0)     | (0.0)        |                  |
| <b>Current asthma at age 22, %</b>         | 103 (6.81)  | 18 (1.33)    | <b>&lt;0.001</b> |
| Missing values                             | 0 (0.0)     | 0 (0.0)      |                  |
| <b>Current wheeze at age 6, %</b>          | 314 (20.77) | 168 (12.39)  | 0.610            |
| Missing values                             | 68 (4.50)   | 616 (45.43)  |                  |
| <b>Current wheeze at age 14, %</b>         | 192 (12.70) | 61 (4.50)    | 0.296            |
| Missing values                             | 104 (6.88)  | 968 (71.39)  |                  |
| <b>Current wheeze at age 22, %</b>         | 202 (13.36) | 28 (2.06)    | 0.582            |
| Missing values                             | 519 (34.33) | 1204 (88.79) |                  |
| <b>Current eczema at age 6, %</b>          | 340 (22.49) | 155 (11.43)  | 0.131            |
| Missing values                             | 90 (5.95)   | 619 (45.65)  |                  |
| <b>Current eczema at age 14, %</b>         | 274 (18.12) | 64 (4.72)    | 0.192            |

|                                                         |              |              |                  |
|---------------------------------------------------------|--------------|--------------|------------------|
| Missing values                                          | 101 (6.68)   | 968 (71.39)  |                  |
| <b>Current eczema at age 22, %</b>                      | 127 (8.40)   | 24 (1.77)    | 0.314            |
| Missing values                                          | 541 (35.78)  | 1207 (89.01) |                  |
| <b>Current hay fever at age 6, %</b>                    | 104 (6.88)   | 50 (3.69)    | <b>&lt;0.001</b> |
| Missing values                                          | 0 (0.0)      | 0 (0.0)      |                  |
| <b>Current hay fever at age 14, %</b>                   | 291 (19.25)  | 66 (4.87)    | 0.113            |
| Missing values                                          | 102 (6.75)   | 968 (71.39)  |                  |
| <b>Current hay fever at age 22, %</b>                   | 177 (11.71)  | 26 (1.92)    | 0.814            |
| Missing values                                          | 102 (34.99)  | 968 (88.86)  |                  |
| <b>Atopy at age 6, %</b>                                |              |              | <b>&lt;0.001</b> |
| Food Allergy only                                       | 32 (2.12)    | 9 (0.66)     |                  |
| Aeroallergens only or both                              | 332 (21.96)  | 78 (5.75)    |                  |
| Missing values                                          | 0 (0.0)      | 0 (0.0)      |                  |
| <b>Current FEV<sub>1</sub> at age 6, (z-scores), %</b>  | -0.85 (0.98) | -0.89 (0.99) | 0.261            |
| Missing values                                          | 139 (9.01)   | 986 (72.71)  |                  |
| <b>Current FEV<sub>1</sub> at age 14, (z-scores), %</b> | -0.46 (1.04) | -0.63 (1.07) | <b>0.024</b>     |
| Missing values                                          | 120 (7.94)   | 1202 (88.64) |                  |
| <b>Current FEV<sub>1</sub> at age 22, (z-scores), %</b> | -0.11 (0.99) | -0.29 (1.07) | 0.071            |
| Missing values                                          | 522 (34.52)  | 1286 (94.84) |                  |
| <b>Current FVC at age 6, (z-scores), %</b>              | -1.08 (1.05) | -1.04 (1.31) | 0.753            |
| Missing values                                          | 139 (9.19)   | 987 (72.79)  |                  |
| <b>Current FVC at age 14, (z-scores), %</b>             | -0.79 (1.06) | -0.87 (1.01) | 0.181            |
| Missing values                                          | 120 (7.93)   | 1202 (88.64) |                  |
| <b>Current FVC at age 22, (z-scores), %</b>             | 0.08 (0.93)  | -0.02 (0.82) | 0.189            |

|                                                             |                   |                   |                  |
|-------------------------------------------------------------|-------------------|-------------------|------------------|
| Missing values                                              | 523 (34.59)       | 1288 (94.99)      |                  |
| <b>Current FEV<sub>1</sub>/FVC at age 6, (z-scores), %</b>  | 0.71 (1.18)       | 0.66 (1.26)       | 0.263            |
| Missing values                                              | 141 (9.33)        | 987 (72.79)       |                  |
| <b>Current FEV<sub>1</sub>/FVC at age 14, (z-scores), %</b> | 0.71 (1.19)       | 0.52 (1.32)       | <b>0.030</b>     |
| Missing values                                              | 120 (7.94)        | 1202 (88.64)      |                  |
| <b>Current FEV<sub>1</sub>/FVC at age 22, (z-scores), %</b> | -0.34 (0.92)      | -0.50 (1.03)      | 0.078            |
| Missing values                                              | 523 (34.59)       | 1288 (94.99)      |                  |
| <b>Current FEV<sub>1</sub> at age 6, (liters), %</b>        | 1.09 (0.47-1.47)  | 1.08 (0.57-1.98)  |                  |
| <b>Current FEV<sub>1</sub> at age 14, (liters), %</b>       | 3.07 (1.07- 5.05) | 2.95 (1.75- 5.01) |                  |
| <b>Current FEV<sub>1</sub> at age 22, (liters), %</b>       | 4.01 (1.97- 6.41) | 3.93 (2.18- 6.49) |                  |
| <b>Current FVC at age 6, (liters), %</b>                    | 1.16 (0.51- 2.07) | 1.17 (0.65- 2.76) |                  |
| <b>Current FVC at age 14, (liters), %</b>                   | 3.38 (1.15- 5.8)  | 3.29 (2.04- 5.62) |                  |
| <b>Current FVC at age 22, (liters), %</b>                   | 4.82 (2.62- 8.42) | 4.79 (2.73- 7.95) |                  |
| <b>Current FEV<sub>1</sub>/FVC at age 6, (liters), %</b>    | 0.94 (0.34- 1.00) | 0.94 (0.33- 1.00) |                  |
| <b>Current FEV<sub>1</sub>/FVC at age 14, (liters), %</b>   | 0.91 (0.6- 1.00)  | 0.90 (0.63- 1.00) |                  |
| <b>Current FEV<sub>1</sub>/FVC at age 22, (liters), %</b>   | 0.84 (0.45- 1.00) | 0.82 (0.59- 0.99) |                  |
| <b>Maternal smoking, %</b>                                  |                   |                   | <b>0.003</b>     |
| Only in pregnancy                                           | 66 (4.37)         | 45 (3.32)         |                  |
| Only at age 6                                               | 106 (7.01)        | 62 (4.57)         |                  |
| Both in pregnancy and at age 6                              | 277 (18.32)       | 183 (13.50)       |                  |
| Missing values                                              | 137 (9.06)        | 646 (47.64)       |                  |
| <b>Paternal smoking, %</b>                                  | 509 (33.66)       | 629 (46.39)       | <b>&lt;0.001</b> |
| Missing values                                              | 55 (3.64)         | 58 (4.28)         |                  |
| <b>Parental asthma, %</b>                                   |                   |                   | 0.291            |



|                              |             |             |                  |
|------------------------------|-------------|-------------|------------------|
| Mother only                  | 215 (14.22) | 88 (6.49)   |                  |
| Father only                  | 124 (8.20)  | 55 (4.06)   |                  |
| Both                         | 36 (2.38)   | 23 (1.70)   |                  |
| Missing values               | 221 (14.62) | 726 (53.54) |                  |
| <b>Parental eczema, %</b>    |             |             | <b>0.701</b>     |
| Mother only                  | 223 (14.75) | 118 (8.70)  |                  |
| Father only                  | 97 (6.42)   | 44 (3.24)   |                  |
| Both                         | 40 (2.65)   | 15 (1.11)   |                  |
| Missing values               | 219 (14.48) | 717 (52.88) |                  |
| <b>Parental hay fever, %</b> |             |             | <b>&lt;0.001</b> |
| Mother only                  | 441 (29.17) | 207 (15.27) |                  |
| Father only                  | 239 (15.81) | 122 (9.00)  |                  |
| Both                         | 21 (13.96)  | 77 (5.68)   |                  |
| Missing values               | 0 (0.0)     | 0 (0.0)     |                  |
| <b>Parental wheeze, %</b>    | 626 (43.90) | 307 (41.60) | <b>0.306</b>     |
| Missing values               | 86 (5.69)   | 618 (45.58) |                  |

*\*Values are means (SD) or percentages (absolute numbers). Differences were tested by using the Student t test for continuous variables, and the  $X^2$  test for categorical variables. \*\*SES=socio economic status was defined by the family incomes, expressed in Australian dollars (\$AUD), LRTI= low respiratory tract infections in the first year of life, URTI= upper respiratory tract infections in the first year of life.*

Supplementary Table 3. Average posterior probabilities for each group within FEV<sub>1</sub>, FVC, and FEV<sub>1</sub>/FVC trajectories.

|                                        | FEV <sub>1</sub> |      |         |               | FVC          |      |         |               | FEV <sub>1</sub> /FVC |             |         |             |
|----------------------------------------|------------------|------|---------|---------------|--------------|------|---------|---------------|-----------------------|-------------|---------|-------------|
|                                        | Trajectories     |      |         |               | Trajectories |      |         |               | Trajectories          |             |         |             |
|                                        | Very Low         | Low  | Average | Above Average | Very Low     | Low  | Average | Above Average | Very Low              | Low-Average | Average | Average-Low |
| <b>Average posterior probabilities</b> | 0.81             | 0.84 | 0.79    | 0.83          | 0.72         | 0.77 | 0.72    | 0.79          | 0.84                  | 0.82        | 0.79    | 0.85        |

Supplementary Table 4. Distribution of forced expiratory flow in one second (FEV<sub>1</sub>), forced vital capacity (FVC) and their ratio (FEV<sub>1</sub>/FVC) in the lung function trajectories in the Raine Study participants with two or more spirometry measurements.

| Trajectory   | FEV <sub>1</sub><br>n (%) |                |                |               | FVC<br>n (%) |                |                |               | FEV <sub>1</sub> /FVC<br>n (%) |                |                |                |
|--------------|---------------------------|----------------|----------------|---------------|--------------|----------------|----------------|---------------|--------------------------------|----------------|----------------|----------------|
|              | Very Low                  | Low            | Average        | Above Average | Very Low     | Low            | Average        | Above Average | Very Low                       | Low-Average    | Average        | Average-Low    |
|              | 51<br>(3.37)              | 746<br>(49.34) | 611<br>(40.41) | 104<br>(6.88) | 61<br>(4.03) | 855<br>(56.55) | 457<br>(30.22) | 139<br>(9.19) | 131<br>(8.66)                  | 198<br>(13.10) | 654<br>(43.25) | 529<br>(34.99) |
| <b>Total</b> | 1512                      |                |                |               | 1512         |                |                |               | 1512                           |                |                |                |

Note. \*All values are given as frequencies with percentages in parentheses.

Supplementary Table 5. Individual distribution of FEV<sub>1</sub> and FVC lung function trajectories in the Raine Study participants with two or more spirometry measurements.

|                  | FVC               |                |                  |                        |                |
|------------------|-------------------|----------------|------------------|------------------------|----------------|
| FEV <sub>1</sub> | Very low<br>n (%) | Low<br>n (%)   | Average<br>n (%) | Above Average<br>n (%) | Total          |
| Very low         | 26<br>(42.62)     | 23<br>(2.69)   | 1<br>(0.22)      | 1<br>(0.72)            | 51<br>(3.37)   |
| Low              | 35<br>(57.38)     | 626<br>(73.22) | 82<br>(17.94)    | 3<br>(2.16)            | 746<br>(49.34) |
| Average          | 0<br>(0.00)       | 206<br>(24.09) | 343<br>(75.05)   | 62<br>(44.60)          | 611<br>(40.41) |
| Above average    | 0<br>(0.00)       | 0<br>(0.00)    | 31<br>(6.78)     | 73<br>(52.52)          | 104<br>(6.88)  |
| <b>Total</b>     | 61                | 457            | 139              | 855                    | 1,512          |

Note. \*All values are given as frequencies with percentages in parentheses.



|                               |            |             |              |             |              |            |             |             |             |              |             |             |             |             |              |
|-------------------------------|------------|-------------|--------------|-------------|--------------|------------|-------------|-------------|-------------|--------------|-------------|-------------|-------------|-------------|--------------|
|                               |            |             |              |             |              |            |             |             |             |              |             |             |             |             |              |
| Aeroallergens only or both    | 11 (21.57) | 161 (21.58) | 131 (21.44)  | 29 (27.88)  |              | 15 (24.59) | 178 (20.82) | 100 (21.88) | 39 (28.06)  |              | 30 (22.90)  | 42 (21.21)  | 107 (20.23) | 153 (23.39) |              |
| <b>Maternal smoking</b>       |            |             |              |             |              |            |             |             |             |              |             |             |             |             |              |
| Never                         | 25 (62.5)  | 454 (67.2)  | 379 (66.8)   | 68 (73.9)   | <b>0.018</b> | 31 (58.5)  | 533 (68.7)  | 273 (65.3)  | 89 (69.5)   | <b>0.022</b> | 67 (54.9)   | 126 (69.6)  | 307 (64.9)  | 426 (71.1)  | <b>0.005</b> |
| Smoking in pregnancy only     | 2 (5.0)    | 24 (3.6)    | 31 (5.5)     | 9 (9.8)     |              | 3 (5.7)    | 30 (3.9)    | 22 (5.3)    | 11 (8.6)    |              | 7 (5.7)     | 8 (4.4)     | 29 (6.1)    | 22 (3.7)    |              |
| Smoke at 6 only               | 0 (0.0)    | 56 (8.3)    | 47 (8.3)     | 3 (3.3)     |              | 5 (9.4)    | 72 (9.3)    | 25 (6.0)    | 4 (3.1)     |              | 8 (6.6)     | 12 (6.6)    | 34 (7.2)    | 52 (8.7)    |              |
| Both                          | 13 (32.5)  | 142 (21.0)  | 110 (19.4)   | 12 (13.0)   |              | 14 (26.4)  | 141 (18.2)  | 98 (23.4)   | 24 (18.8)   |              | 40 (32.8)   | 35 (19.3)   | 103 (21.8)  | 99 (16.5)   |              |
| <b>Paternal smoking</b>       |            |             |              |             | 0.983        |            |             |             |             | 0.739        |             |             |             |             | 0.631        |
| No                            | 32 (62.75) | 476 (63.81) | 378 (61.87)  | 62 (59.62)  |              | 35 (57.38) | 546 (63.86) | 283 (61.93) | 84 (60.43)  |              | 72 (54.96)  | 127 (64.14) | 332 (62.76) | 417 (63.76) |              |
| Yes                           | 17 (33.33) | 243 (32.57) | 211 (34.53)  | 38 (36.54)  |              | 25 (40.98) | 278 (32.51) | 155 (33.92) | 51 (36.69)  |              | 52 (39.69)  | 65 (32.83)  | 178 (33.65) | 214 (32.72) |              |
| <b>Respiratory infections</b> |            |             |              |             |              |            |             |             |             |              |             |             |             |             |              |
| Never                         | 26 (51.0)  | 345 (46.3)  | 263 (43.0)   | 42 (40.4)   | 0.080        | 32 (52.5)  | 380 (44.4)  | 206 (45.1)  | 58 (41.7)   | 0.532        | 62 (47.4)   | 84 (42.4)   | 240 (45.4)  | 290 (44.3)  | 0.928        |
| URTI only                     | 9 (17.7)   | 233 (31.2)  | 221 (36.2)   | 40 (38.5)   |              | 14 (23.0)  | 283 (33.1)  | 152 (33.3)  | 54 (38.9)   |              | 39 (29.8)   | 69 (34.9)   | 170 (32.1)  | 225 (34.4)  |              |
| LRTI or both                  | 16 (31.4)  | 168 (22.5)  | 127 (20.8)   | 22 (21.2)   |              | 15 (24.6)  | 192 (22.5)  | 99 (21.7)   | 27 (19.4)   |              | 30 (22.9)   | 45 (22.7)   | 119 (22.5)  | 139 (21.3)  |              |
| <b>Preterm birth</b>          | 3 (6.4)    | 56 (7.9)    | 36 (6.1)     | 6 (6.0)     | 0.649        | 6 (10.0)   | 57 (7.0)    | 30 (6.9)    | 8 (5.9)     | 0.776        | 6 (4.7)     | 18 (9.6)    | 46 (9.1)    | 31 (5.0)    | <b>0.015</b> |
| <b>Birthweight</b>            |            |             |              |             | 0.132        |            |             |             |             | 0.369        |             |             |             |             | 0.058        |
| Low                           | 10 (13.89) | 62 (7.49)   | 170 (9.18)   | 7 (5.98)    |              | 8 (13.11)  | 68 (7.95)   | 38 (8.32)   | 8 (5.76)    |              | 123 (93.86) | 177 (89.39) | 477 (90.17) | 613 (93.73) |              |
| Normal                        | 62 (86.11) | 766 (92.51) | 1681 (90.82) | 110 (94.02) |              | 53 (86.89) | 787 (92.05) | 419 (91.68) | 131 (94.24) |              | 8 (6.11)    | 21 (10.61)  | 52 (9.83)   | 41 (6.27)   |              |
| <b>Parental Asthma</b>        |            |             |              |             |              |            |             |             |             |              |             |             |             |             |              |
| No                            | 25 (64.1)  | 446 (69.9)  | 376 (71.4)   | 69 (79.3)   | 0.485        | 29 (58.0)  | 523 (71.6)  | 272 (70.1)  | 92 (74.8)   | 0.677        | 72 (65.5)   | 135 (76.3)  | 288 (65.2)  | 421 (74.9)  | 0.064        |
| Mother only                   | 10 (25.6)  | 104 (16.3)  | 90 (17.1)    | 11 (12.6)   |              | 13 (26.0)  | 115 (15.8)  | 67 (17.3)   | 20 (16.3)   |              | 21 (19.1)   | 25 (14.1)   | 88 (19.9)   | 81 (14.4)   |              |
| Father only                   | 4 (10.3)   | 66 (10.3)   | 49 (9.3)     | 5 (5.8)     |              | 6 (12.0)   | 72 (9.9)    | 37 (9.5)    | 9 (7.3)     |              | 14 (12.7)   | 13 (7.3)    | 50 (11.3)   | 47 (8.4)    |              |
| Both                          | 0 (0.00)   | 22 (3.5)    | 12 (2.3)     | 2 (2.3)     |              | 2 (7.3)    | 20 (2.7)    | 12 (3.1)    | 2 (1.6)     |              | 3 (2.7)     | 4 (2.3)     | 16 (3.6)    | 13 (2.3)    |              |
| <b>Parental Eczema</b>        |            |             |              |             |              |            |             |             |             |              |             |             |             |             |              |
| No                            | 32 (80.0)  | 453 (71.3)  | 379 (71.6)   | 69 (77.5)   | 0.399        | 36 (69.2)  | 541 (73.9)  | 265 (68.3)  | 91 (75.2)   | 0.399        | 69 (63.9)   | 136 (76.4)  | 317 (72.1)  | 411 (72.5)  | 0.265        |
| Mother only                   | 3          | 113         | 96           | 11          |              | 9          | 115         | 79          | 20          |              | 23          | 24          | 74          | 102         |              |

|                           |              |               |               |               |       |              |               |               |              |       |              |              |               |               |              |
|---------------------------|--------------|---------------|---------------|---------------|-------|--------------|---------------|---------------|--------------|-------|--------------|--------------|---------------|---------------|--------------|
|                           | (7.5)        | (17.8)        | (18.2)        | (12.4)        |       | (17.3)       | (15.7)        | (20.4)        | (16.5)       |       | (21.3)       | (13.5)       | (16.8)        | (18.0)        |              |
| Father only               | 4<br>(10.0)  | 54<br>(8.5)   | 33<br>(6.2)   | 6<br>(6.7)    |       | 6<br>(11.5)  | 57<br>(7.8)   | 27<br>(7.0)   | 7<br>(5.8)   |       | 14<br>(13.0) | 11<br>(6.2)  | 36<br>(8.2)   | 36<br>(6.4)   |              |
| Both                      | 1<br>(2.5)   | 15<br>(2.4)   | 21<br>(4.0)   | 3<br>(3.4)    |       | 1<br>(1.9)   | 19<br>(2.6)   | 17<br>(4.4)   | 3<br>(2.5)   |       | 2<br>(1.9)   | 7<br>(3.9)   | 13<br>(3.0)   | 18<br>(3.2)   |              |
| <b>Parental Hay Fever</b> |              |               |               |               |       |              |               |               |              |       |              |              |               |               |              |
| No                        | 26<br>(51.0) | 325<br>(43.6) | 229<br>(37.5) | 41<br>(39.4)  | 0.444 | 24<br>(39.3) | 384<br>(44.9) | 167<br>(36.5) | 46<br>(33.1) | 0.052 | 56<br>(42.8) | 75<br>(37.9) | 217<br>(41.0) | 273<br>(41.7) | 0.771        |
| Mother only               | 14<br>(27.5) | 214<br>(28.7) | 185<br>(30.3) | 28<br>(26.9)  |       | 19<br>(31.2) | 242<br>(28.3) | 138<br>(30.2) | 42<br>(30.2) |       | 32<br>(24.4) | 60<br>(30.3) | 150<br>(28.4) | 199<br>(30.4) |              |
| Father only               | 6<br>(11.8)  | 111<br>(14.9) | 104<br>(17.0) | 18<br>(17.3)  |       | 11<br>(18.0) | 117<br>(13.7) | 86<br>(18.8)  | 25<br>(18.0) |       | 26<br>(19.9) | 34<br>(17.2) | 88<br>(16.6)  | 91<br>(13.9)  |              |
| Both                      | 5<br>(9.8)   | 96<br>(12.9)  | 93<br>(15.2)  | 17<br>(16.35) |       | 7<br>(11.5)  | 112<br>(13.1) | 66<br>(14.4)  | 26<br>(18.7) |       | 17<br>(13.0) | 29<br>(14.7) | 74<br>(14.0)  | 91<br>(13.9)  |              |
| <b>Parental Wheeze</b>    | 27<br>(57.4) | 306 (43.6)    | 252<br>(43.5) | 41<br>(42.3)  | 0.298 | 28<br>(48.3) | 345<br>(42.8) | 190<br>(44.6) | 63<br>(46.7) | 0.708 | 74<br>(59.2) | 78<br>(40.4) | 226<br>(46.2) | 248<br>(40.1) | <b>0.001</b> |

*Note. \*All values are given as frequencies with percentages in parentheses. \*\*Significance of differences was evaluated by chi-square test and are given in bold. \*\*\*SES= socio economic status, LRTI= low respiratory tract infections in the first year of life, URTI= upper respiratory tract infections in the first year of life \*\*\*\*The average trajectory of FEV<sub>1</sub>, FEV<sub>1</sub>/FVC and FVC respectively were used as reference category.*
